# Supplementary material for: Access to Enantiomerically Pure P-Chiral 1-Phosphanorbornane Silyl Ethers
Source: MDPI journal article supplement (doi:10.3390/molecules28176210), 2023-08-23
Supplement: s1 [file s1]

# Access to Enantiomerically Pure *P*-chiral 1-Phosphanorbornane Silyl Ethers

Kyzgaldak Ramazanova <sup>1</sup>, Soumyadeep Chakraborty <sup>2</sup>, Fabian Kallmeier <sup>2</sup>, Nadja Kretzschmar <sup>1</sup>, Sergey Tin <sup>2</sup>, Peter Lönnecke <sup>1</sup>, Johannes G. de Vries<sup>2</sup> and Evamarie Hey-Hawkins <sup>1,\*</sup>

<sup>1</sup>Institute of Inorganic Chemistry, Faculty of Chemistry and Mineralogy, Leipzig University, Johannisallee 29, 04103, Leipzig, Germany

<sup>2</sup>Leibniz Institute for Catalysis (LIKAT), Albert-Einstein-Straße 29A, 18059, Rostock, Germany

\*Correspondence: [hey@uni-leipzig.de](mailto:hey@uni-leipzig.de)

## Table of Contents

|                                                     |    |
|-----------------------------------------------------|----|
| 1. NMR spectra of <b>5a,b</b> and <b>6a,b</b> ..... | 2  |
| 2. HPLC data of <b>5a</b> .....                     | 8  |
| 3. X-ray crystallography .....                      | 9  |
| 4. NMR spectra of <b>P2</b> .....                   | 11 |
| 5. HPLC chromatograms of <b>P2</b> .....            | 12 |

Numbering scheme:

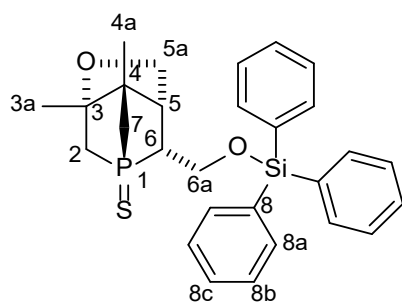

**5a**

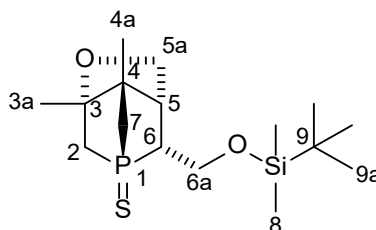

**5b**

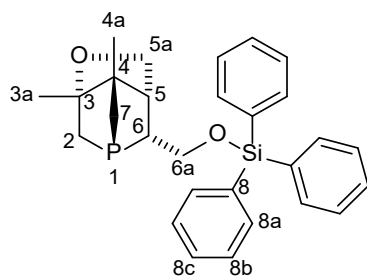

**6a**

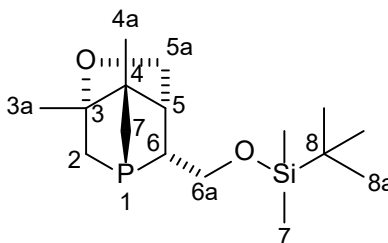

**6b**

**NMR spectra of 5a:**

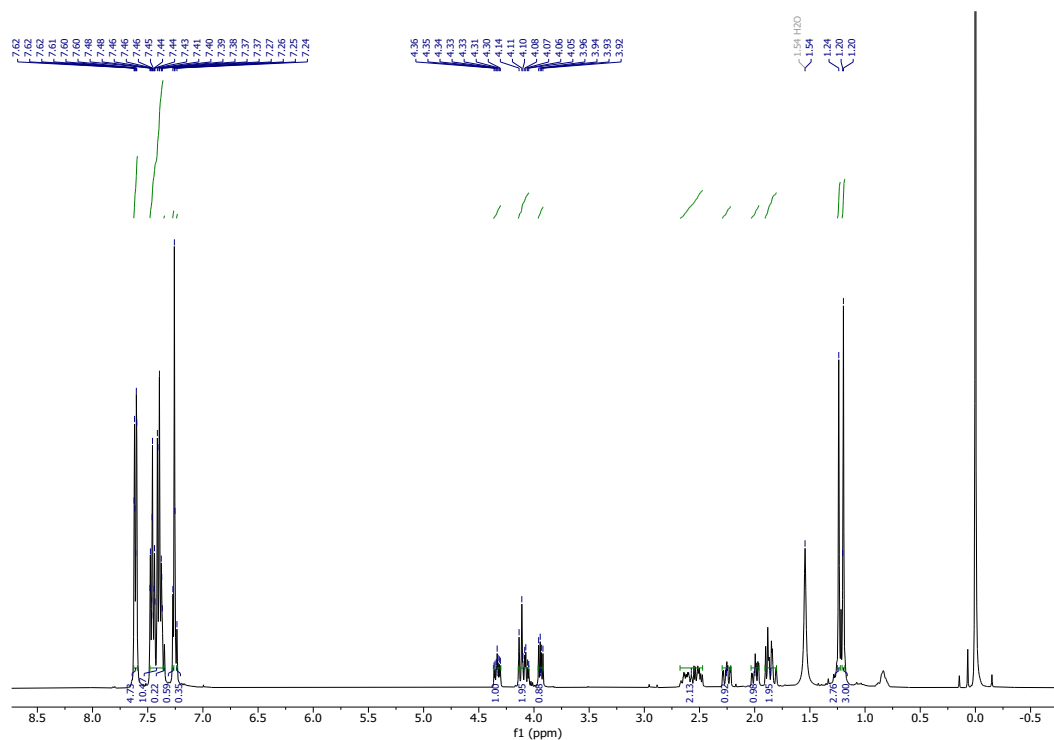

**Figure S1.**  $^1\text{H}$  NMR spectrum of **5a** in  $\text{CDCl}_3$ .

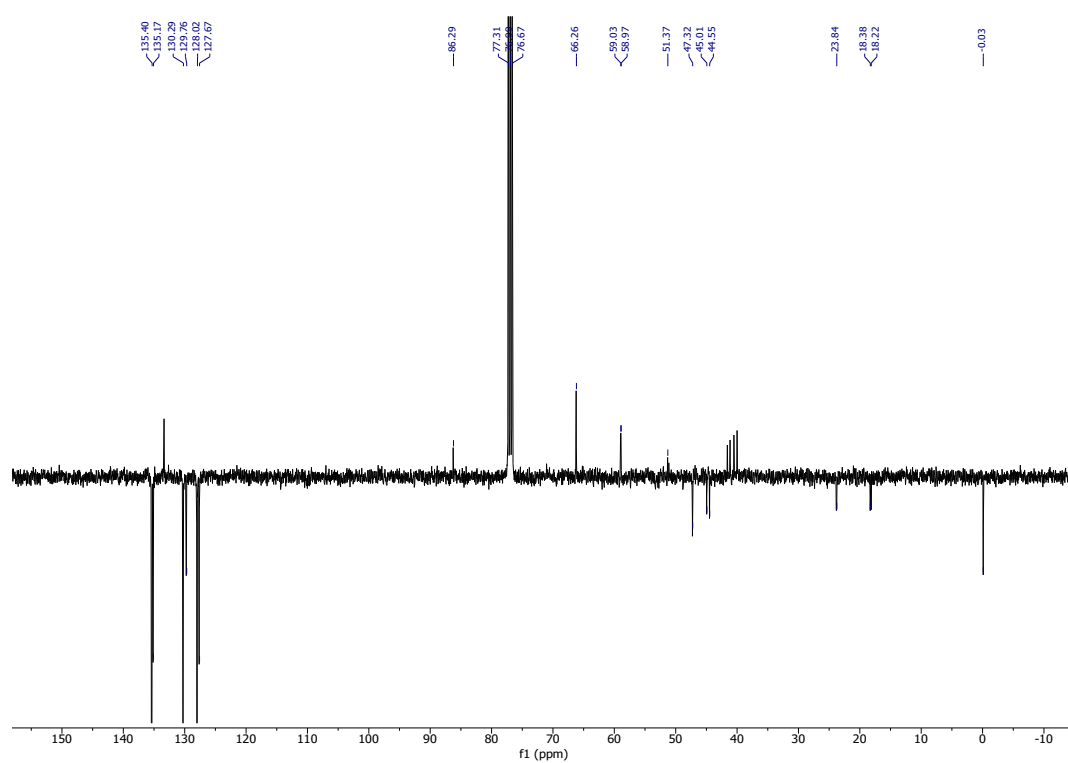

**Figure S2.**  $^{13}\text{C}\{^1\text{H}\}$  APT NMR spectrum of **5a** in  $\text{CDCl}_3$ .

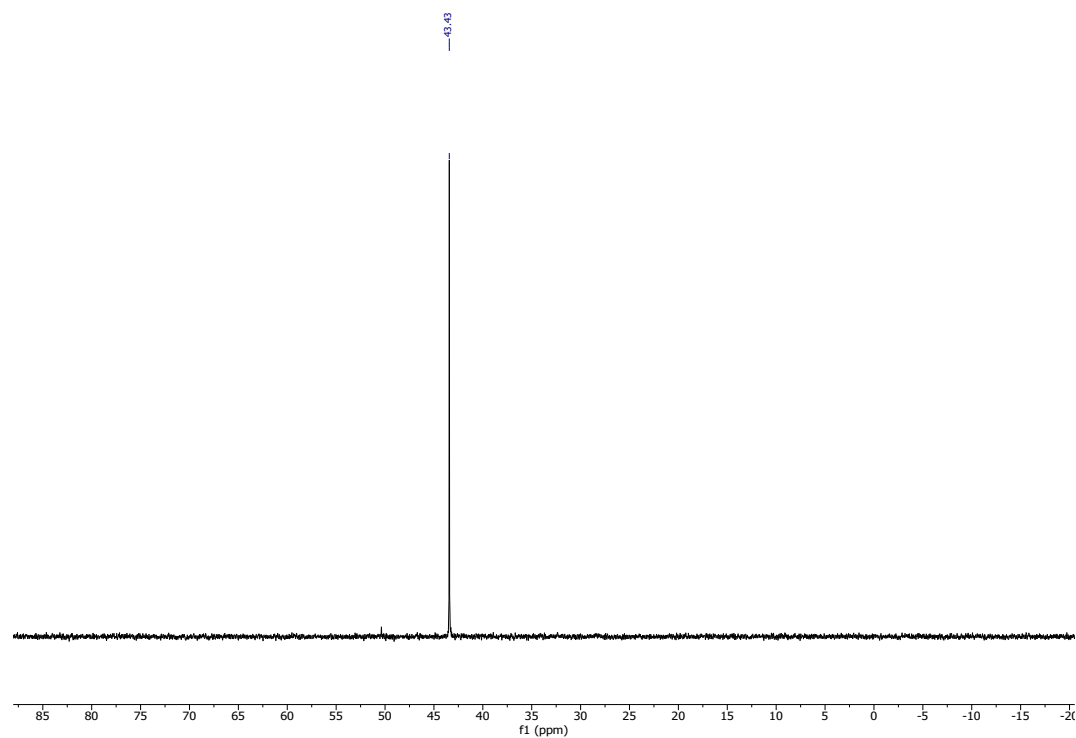

**Figure S3.**  $^{31}\text{P}\{^1\text{H}\}$  NMR spectrum of **5a** in  $\text{CDCl}_3$ .

**NMR spectra of 5b:**

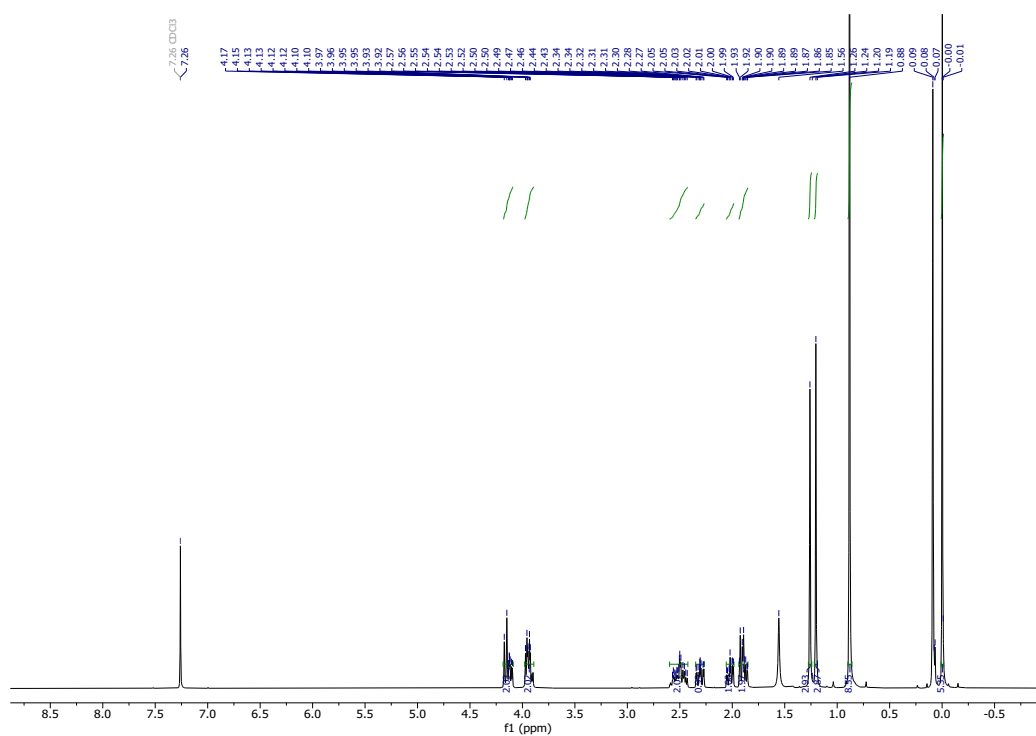

**Figure S4.** <sup>1</sup>H NMR spectrum of **5b** in CDCl<sub>3</sub>.

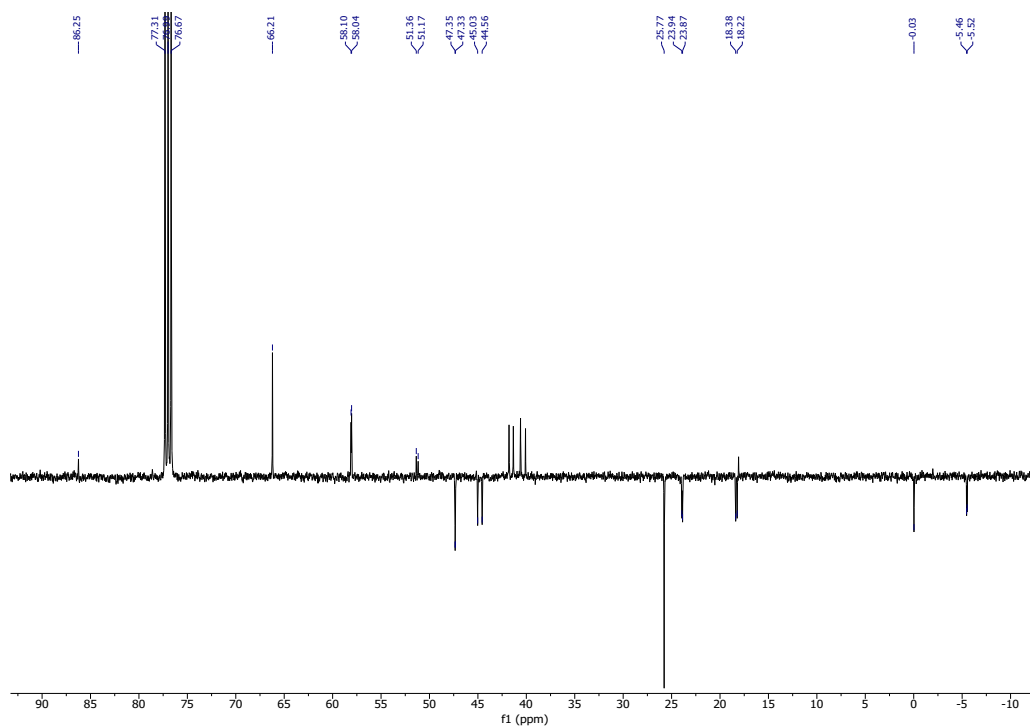

**Figure S5.** <sup>13</sup>C{<sup>1</sup>H} APT NMR spectrum of **5b** in CDCl<sub>3</sub>.

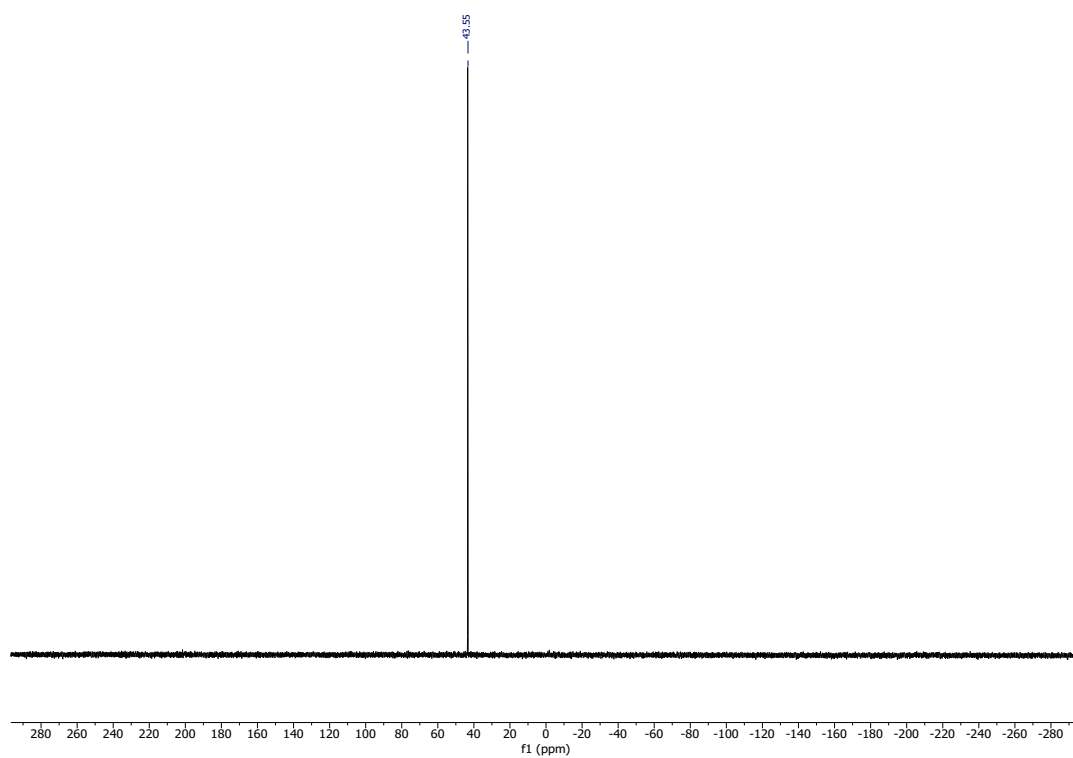

**Figure S6.**  $^{31}\text{P}\{^1\text{H}\}$  NMR spectrum of **5b** in  $\text{CDCl}_3$ .

**NMR spectra of 6a:**

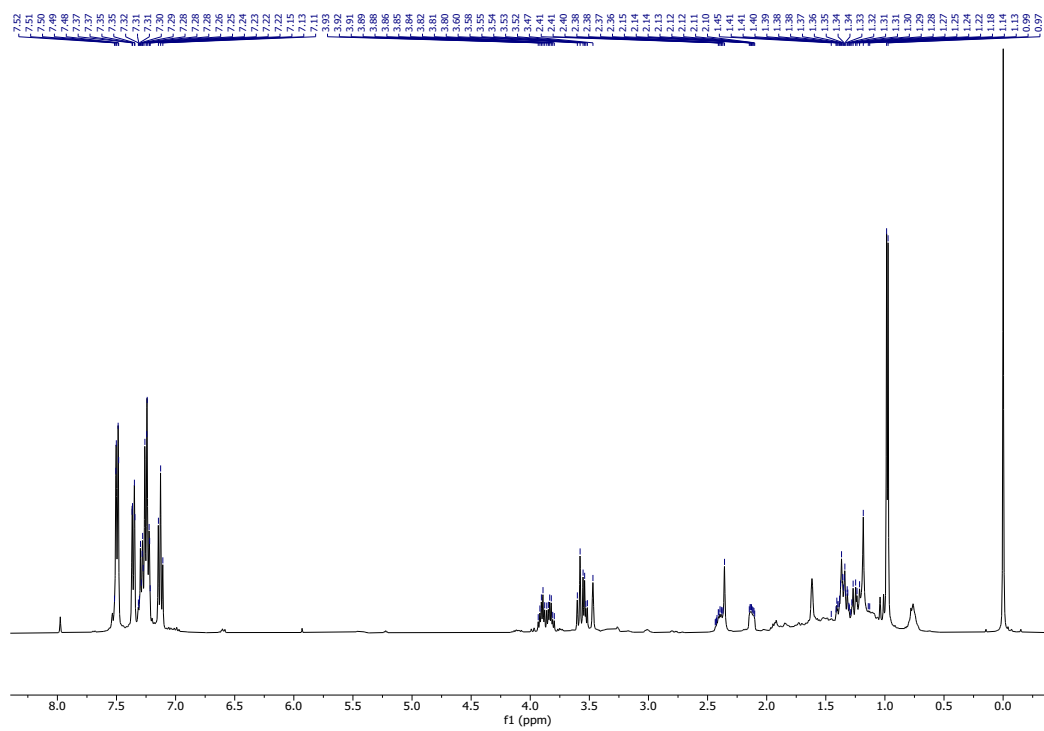

**Figure S7.**  $^1\text{H}$  NMR spectrum of **6a** in  $\text{THF-d}_8$ .

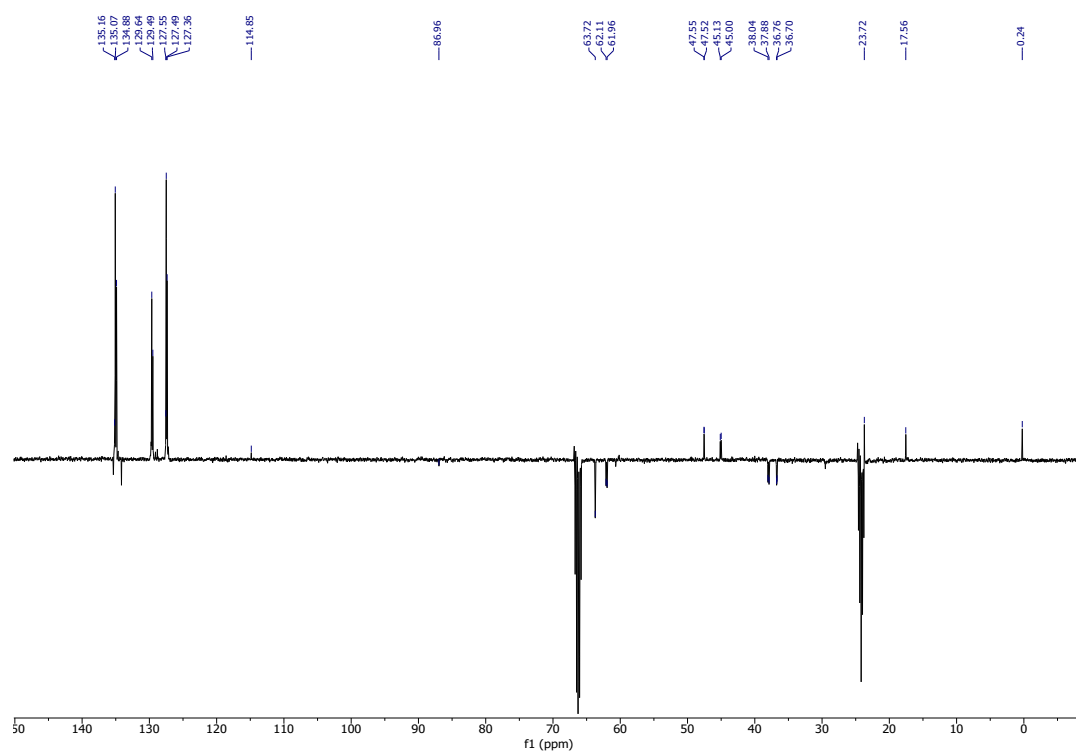

Figure S8.  $^{13}\text{C}\{^1\text{H}\}$  APT NMR spectrum of **6a** in  $\text{THF-d}_8$ .

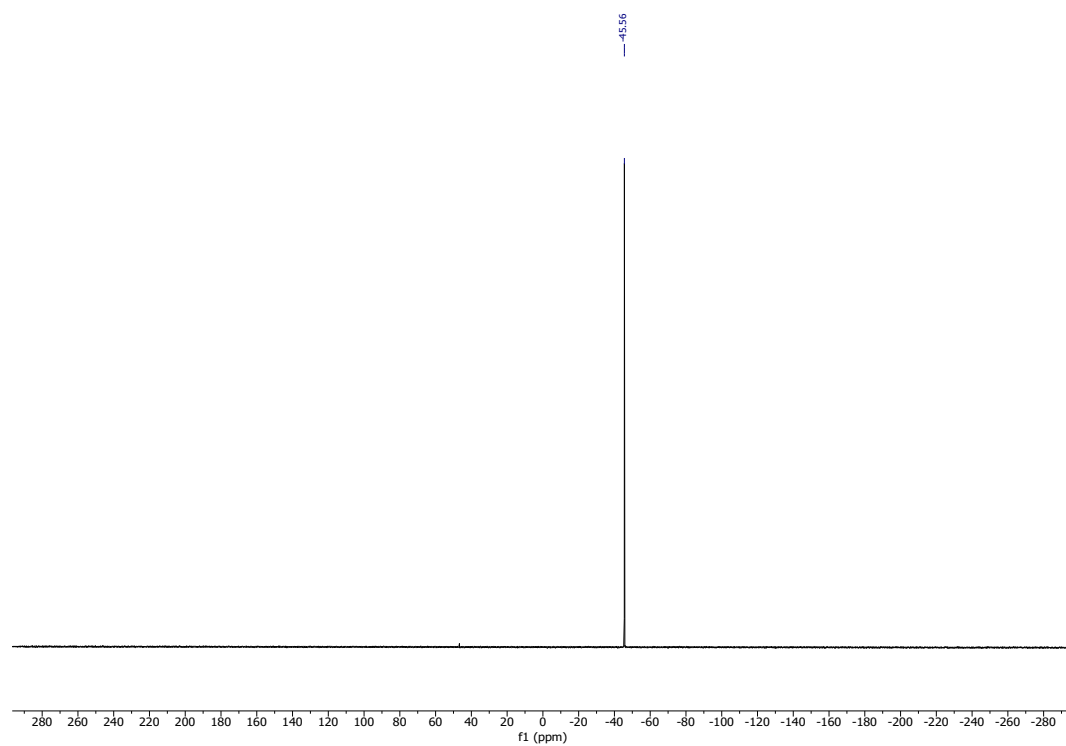

Figure S9.  $^{31}\text{P}\{^1\text{H}\}$  NMR spectrum of **6a** in  $\text{C}_6\text{D}_6$ .

**NMR spectra of 6b:**

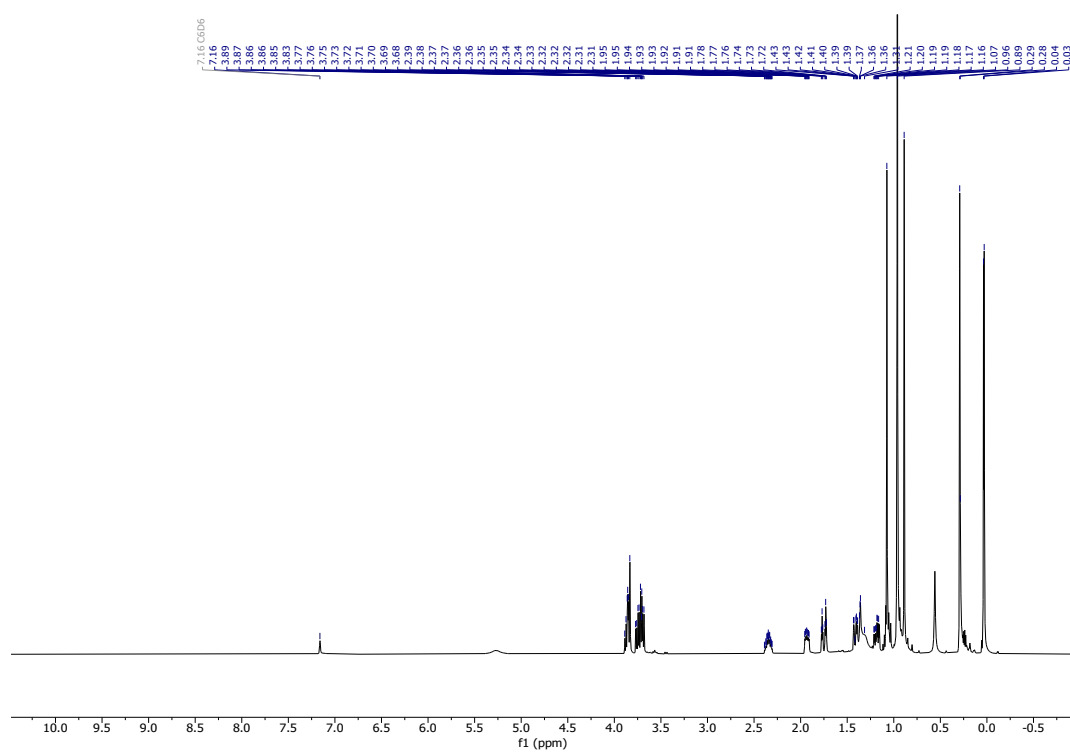

**Figure S10.**  $^1\text{H}$  NMR spectrum of **6b** in  $\text{C}_6\text{D}_6$ .

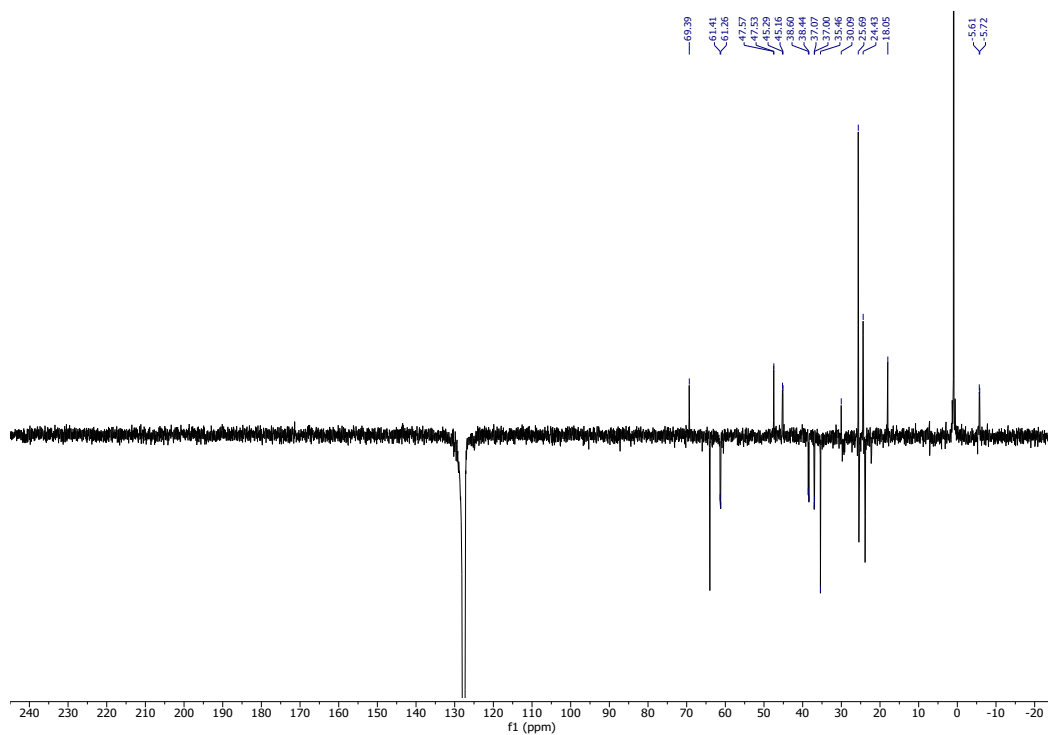

**Figure S11.**  $^{13}\text{C}\{^1\text{H}\}$  APT NMR spectrum of **6b** in  $\text{C}_6\text{D}_6$ .

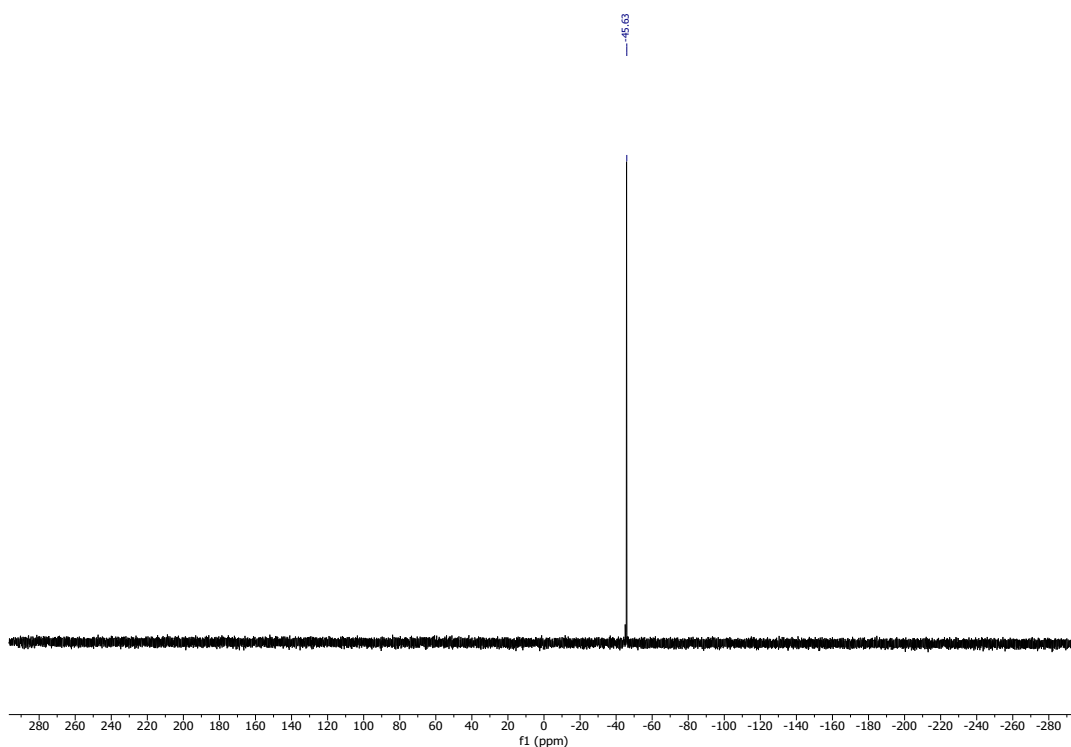

**Figure S12.**  $^{31}\text{P}\{^1\text{H}\}$  NMR spectrum of **6b** in  $\text{C}_6\text{D}_6$ .

## 2. HPLC data of **5a**

Eluent: 20% *i*PrOH, 80% *n*-hexane

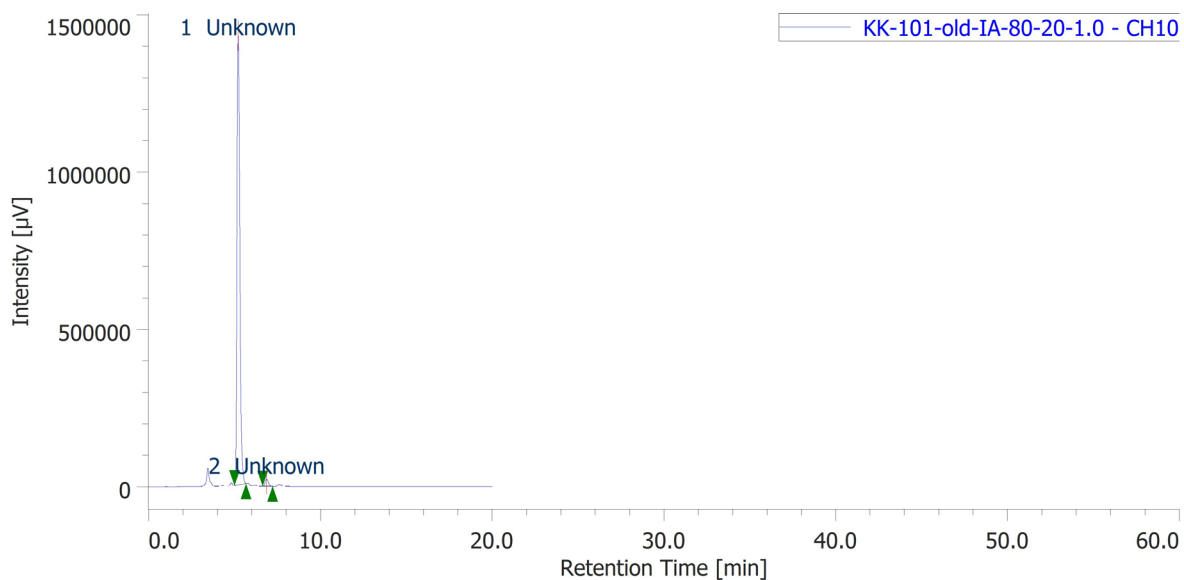

**Figure S13.** Chromatogram of **5a**.

| # | Peak Name | CH | tR [min] | Area [μV·sec] | Height [μV] | Area%  | Height% | Quantity | NTP  | Resolution | Symmetry Factor | Warning |
|---|-----------|----|----------|---------------|-------------|--------|---------|----------|------|------------|-----------------|---------|
| 1 | Unknown   | 10 | 5.203    | 16650701      | 1426840     | 98.260 | 98.395  | N/A      | 4594 | 5.193      | 1.402           |         |
| 2 | Unknown   | 10 | 6.863    | 294923        | 23278       | 1.740  | 1.605   | N/A      | 6759 | N/A        | 1.158           |         |



### 3. X-ray crystallography

**Table S1.** X-ray crystallography data of compounds **5a** and **5b**

| Compound                                       | <b>5a</b>                                           | <b>5b</b>                                           |
|------------------------------------------------|-----------------------------------------------------|-----------------------------------------------------|
| Empirical formula                              | C <sub>28</sub> H <sub>31</sub> O <sub>2</sub> PSSi | C <sub>16</sub> H <sub>31</sub> O <sub>2</sub> PSSi |
| Formula weight                                 | 490.65                                              | 346.53                                              |
| Temperature [K]                                | 130(2) K                                            | 130(2) K                                            |
| Wavelength [pm]                                | 71.073 pm                                           | 71.073 pm                                           |
| Crystal system                                 | Triclinic                                           | Monoclinic                                          |
| Space group                                    | <i>P</i> 1                                          | <i>P</i> 2 <sub>1</sub>                             |
| Unit cell dimensions                           |                                                     |                                                     |
| a [pm]                                         | a = 897.11(3)                                       | a = 1085.78(4)                                      |
| b [pm]                                         | b = 1259.36(4)                                      | b = 761.49(2)                                       |
| c [pm]                                         | c = 1337.86(4)                                      | c = 1172.77(3)                                      |
| α [deg]                                        | 63.086(3)                                           | 90                                                  |
| β [deg]                                        | 74.155(3)                                           | 96.596(3)                                           |
| γ [deg]                                        | 69.466(3)                                           | 90                                                  |
| Volume [nm <sup>3</sup> ]                      | 1.25028(8)                                          | 0.96324(5)                                          |
| Z                                              | 2                                                   | 2                                                   |
| ρ <sub>(calculated)</sub> [Mg/m <sup>3</sup> ] | 1.303                                               | 1.195                                               |
| μ [mm <sup>-1</sup> ]                          | 0.265                                               | 0.316                                               |
| F(000)                                         | 520                                                 | 376                                                 |
| Crystal size [mm <sup>3</sup> ]                | 0.20 · 0.20 · 0.03                                  | 0.50 · 0.25 · 0.02                                  |
| Θ <sub>Min</sub> / Θ <sub>Max</sub> [deg]      | 1.881 / 32.599                                      | 1.748 / 32.457                                      |
|                                                | -13 ≤ h ≤ 13                                        | -15 ≤ h ≤ 16                                        |
| Index ranges                                   | -18 ≤ k ≤ 18                                        | -11 ≤ k ≤ 10                                        |
|                                                | -20 ≤ l ≤ 20                                        | -17 ≤ l ≤ 17                                        |
| Reflections collected                          | 26920                                               | 15131                                               |
| Indp. reflections (R <sub>int</sub> )          | 15734 (0.0349)                                      | 6338 (0.0415)                                       |
| Completeness (Θ <sub>Max</sub> )               | 100.0 % (30.510)                                    | 100.0 % (30.510)                                    |
| T <sub>Max</sub> / T <sub>Min</sub>            | 1.00000 / 0.75234                                   | 1.00000 / 0.74332                                   |

|                                                         |                 |                 |
|---------------------------------------------------------|-----------------|-----------------|
| Restraints / parameters                                 | 15 / 843        | 1 / 197         |
| Gof on F <sup>2</sup>                                   | 1.017           | 1.022           |
| R1 / wR2 ( $I > 2\sigma(I)$ )                           | 0.0476 / 0.0930 | 0.0428 / 0.0859 |
| R1 / wR2 (all data)                                     | 0.0659 / 0.1015 | 0.0570 / 0.0928 |
| Absolute structure parameter                            | -0.01(4)        | 0.07(5)         |
| Residual electron density [ $e \cdot \text{\AA}^{-3}$ ] | 0.324 / -0.360  | 0.243 / -0.336  |
| CCDC Number                                             | 2287331         | 2287332         |

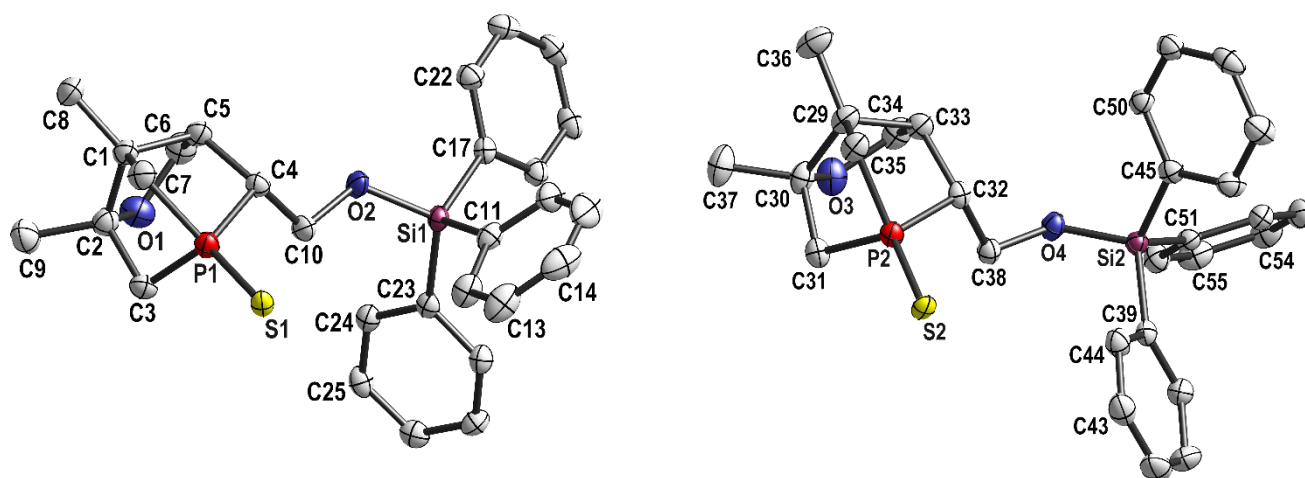

**Figure S14.** Molecular structure of **5a**. Hydrogen atoms were omitted for clarity. Both independent molecules of **5a** are shown. Displacement ellipsoids are drawn at the 50 % probability level.

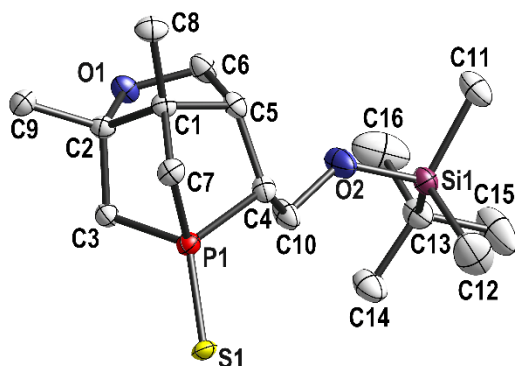

**Figure S15.** Molecular structure of **5b**. Hydrogen atoms were omitted for clarity. Displacement ellipsoids are drawn at the 50 % probability level.

## 4. NMR spectra of P2

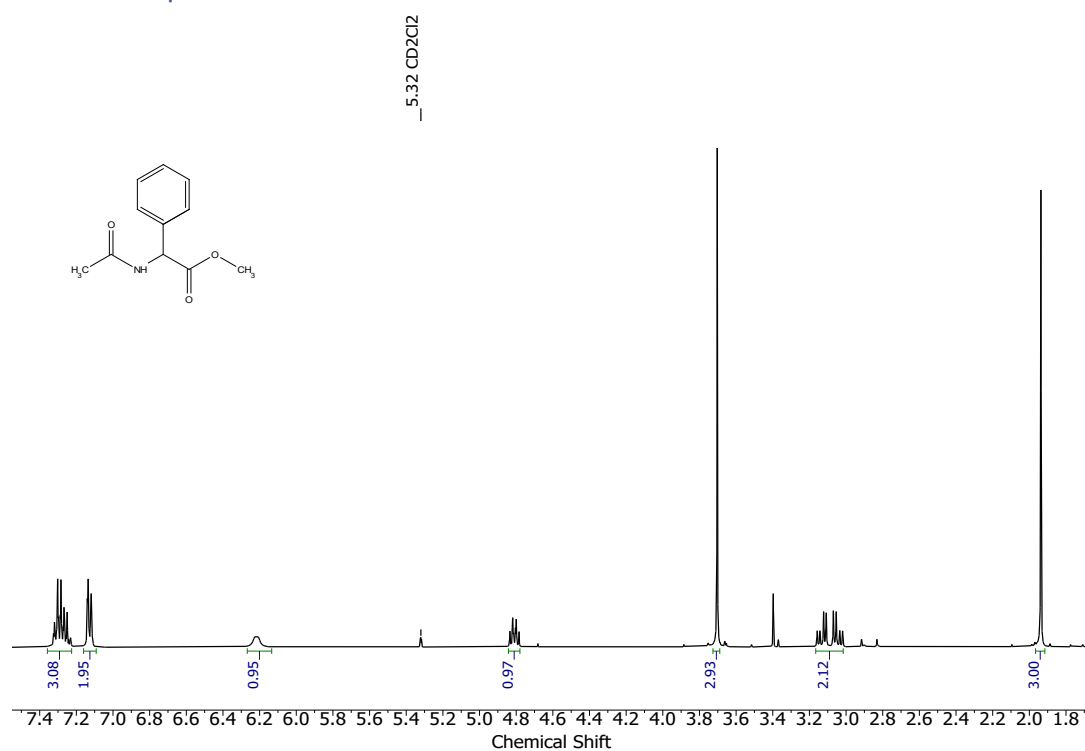

**Figure S16.** <sup>1</sup>H NMR spectrum of **P2** in CD<sub>2</sub>Cl<sub>2</sub>.

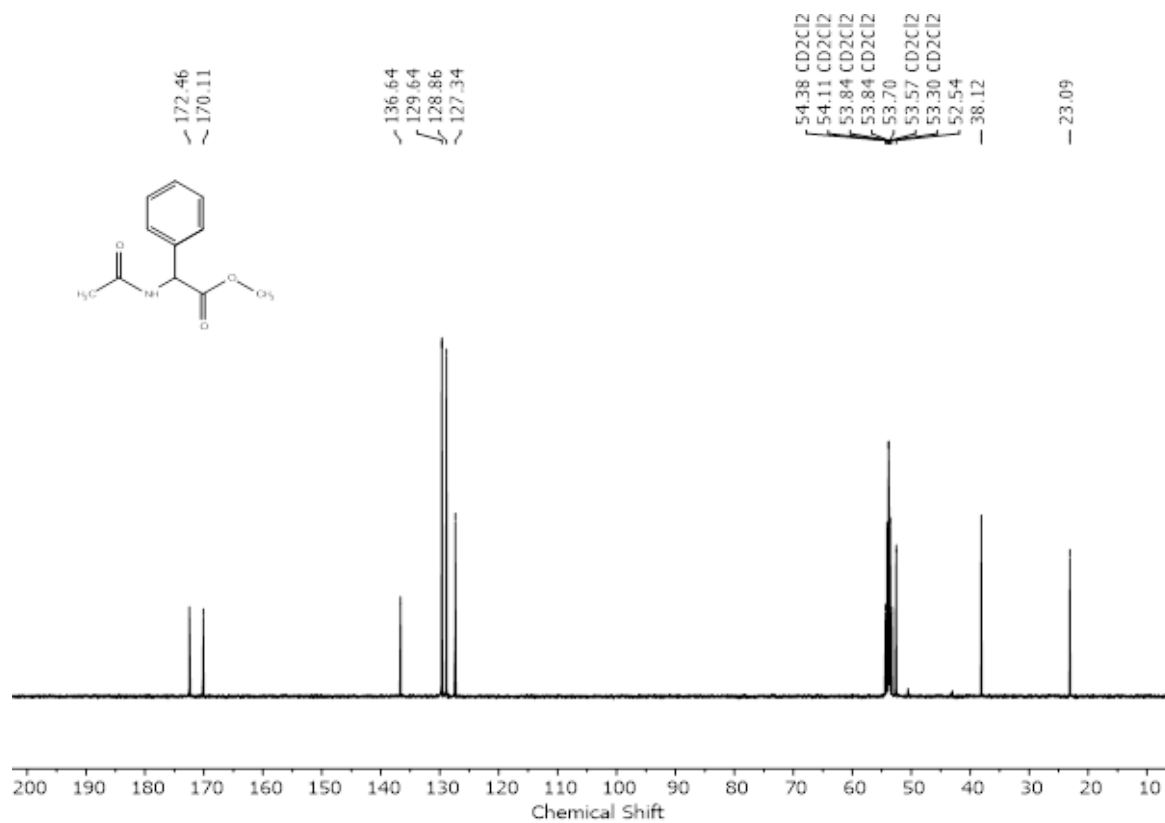

**Figure S17.** <sup>13</sup>C{<sup>1</sup>H} NMR spectrum of **P2** in CD<sub>2</sub>Cl<sub>2</sub>.

## 5. GC traces of P2

Chiral GC column: 25m Lipodex G

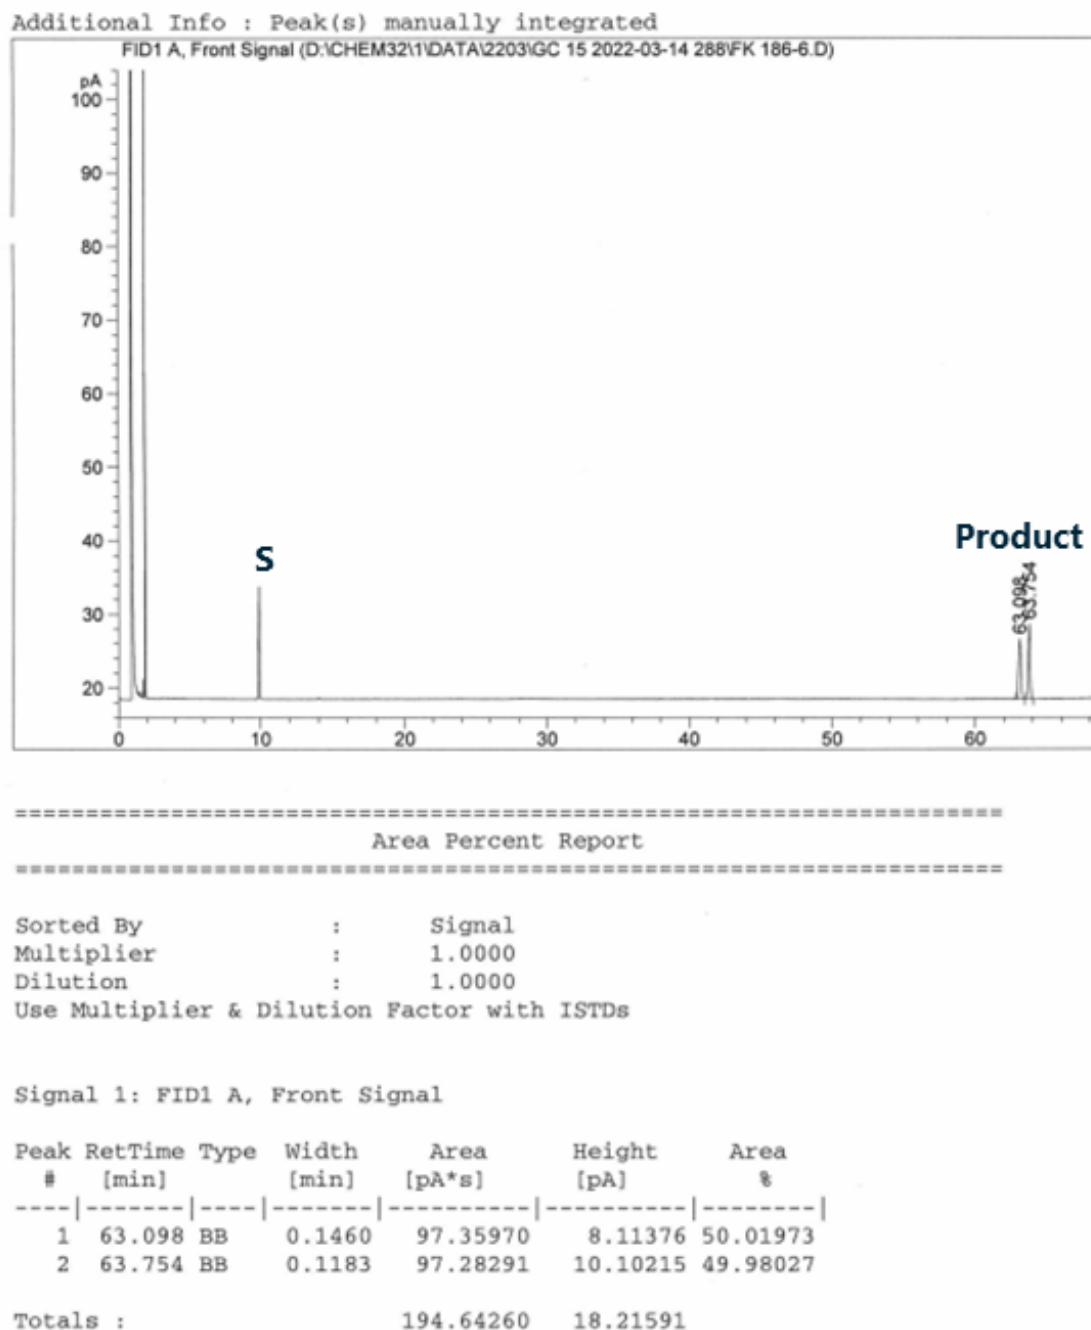

Figure S18. Chromatogram of racemic P2 (S = solvent).

Additional Info : Peak(s) manually integrated

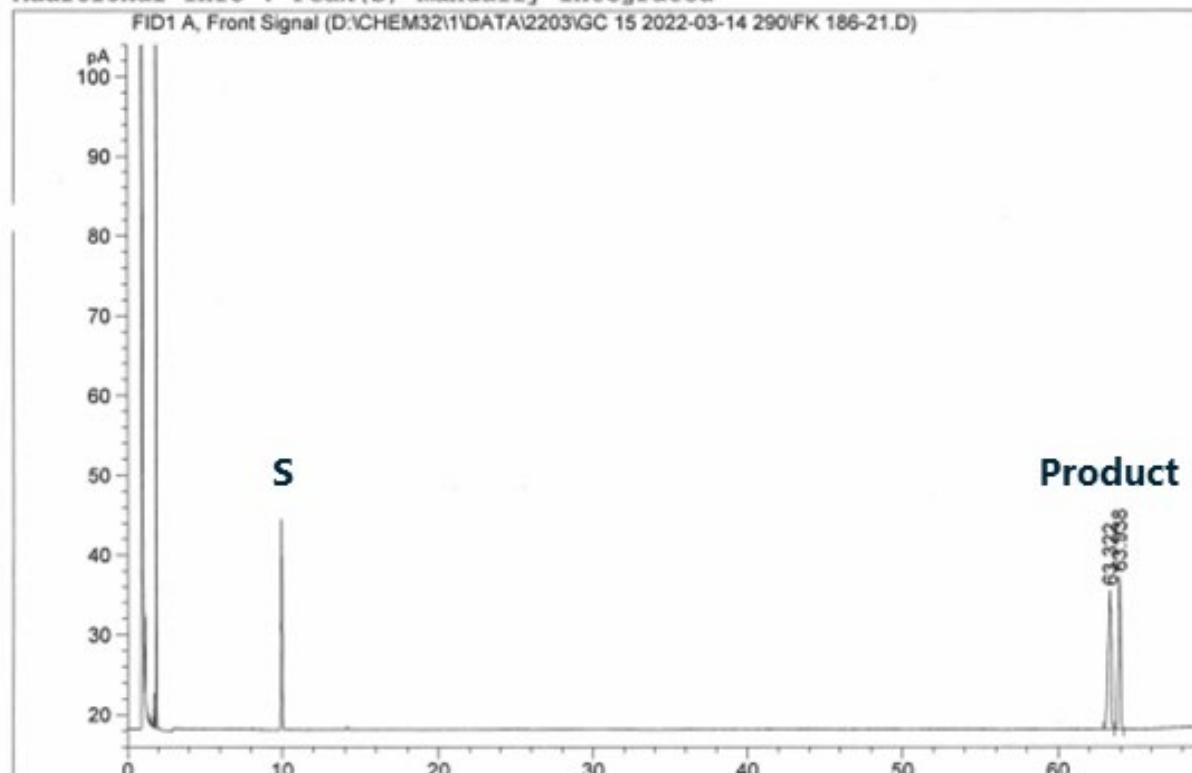

=====  
Area Percent Report  
=====

Sorted By : Signal  
Multiplier : 1.0000  
Dilution : 1.0000  
Use Multiplier & Dilution Factor with ISTDs

Signal 1: FID1 A, Front Signal

| Peak #   | RetTime [min] | Type | Width [min] | Area [pA*s] | Height [pA] | Area %   |
|----------|---------------|------|-------------|-------------|-------------|----------|
| 1        | 63.322        | BV   | 0.1750      | 228.11862   | 17.28439    | 54.28441 |
| 2        | 63.938        | VB   | 0.1218      | 192.11002   | 19.02892    | 45.71559 |
| Totals : |               |      |             | 420.22864   | 36.31330    |          |

Handwritten notes: 54.30% and 45.70% are written next to the area percentages in the table.

Figure S19. Chromatogram of enantio-enriched **P2** (Table 2, Entry 2, (S = solvent)).

Additional Info : Peak(s) manually integrated

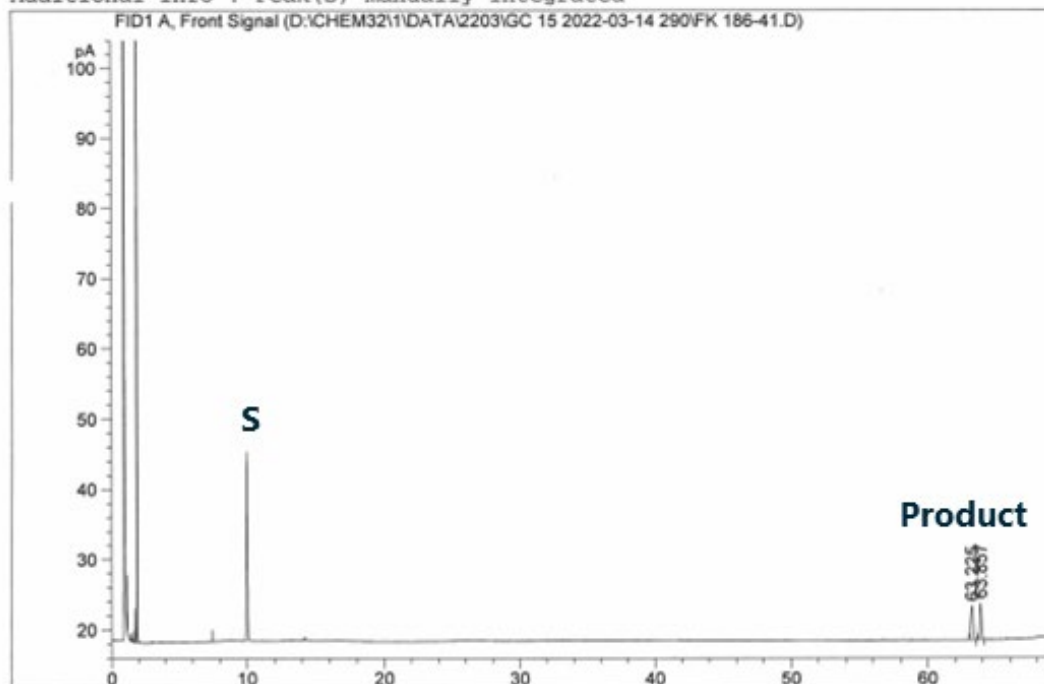

=====  
Area Percent Report  
=====

Sorted By : Signal  
Multiplier : 1.0000  
Dilution : 1.0000  
Use Multiplier & Dilution Factor with ISTDs

Signal 1: FID1 A, Front Signal

| Peak #   | RetTime [min] | Type | Width [min] | Area [pA*s] | Height [pA] | Area %   |
|----------|---------------|------|-------------|-------------|-------------|----------|
| 1        | 63.225        | BB   | 0.1397      | 54.31665    | 4.77688     | 53.61098 |
| 2        | 63.857        | BB   | 0.1192      | 46.99963    | 5.11480     | 46.38902 |
| Totals : |               |      |             | 101.31628   | 9.89168     |          |

153, 53%  
146, 47%

**Figure S20.** Chromatogram of enantio-enriched **P2** (Table 2, Entry 5, (S = solvent)).
